# Supplementary material for: C-reactive protein in traditional melanesians on Kitava
Source: PubMed Central journal article supplement (PMC7745357; doi:10.1186/s12872-020-01812-7), 2020-12-17
Supplement: 12872_2020_1812_MOESM1_ESM.pdf [file 12872_2020_1812_MOESM1_ESM.pdf]

**Figure S1***Enrollment and Samples Analyzed for C-reactive Protein*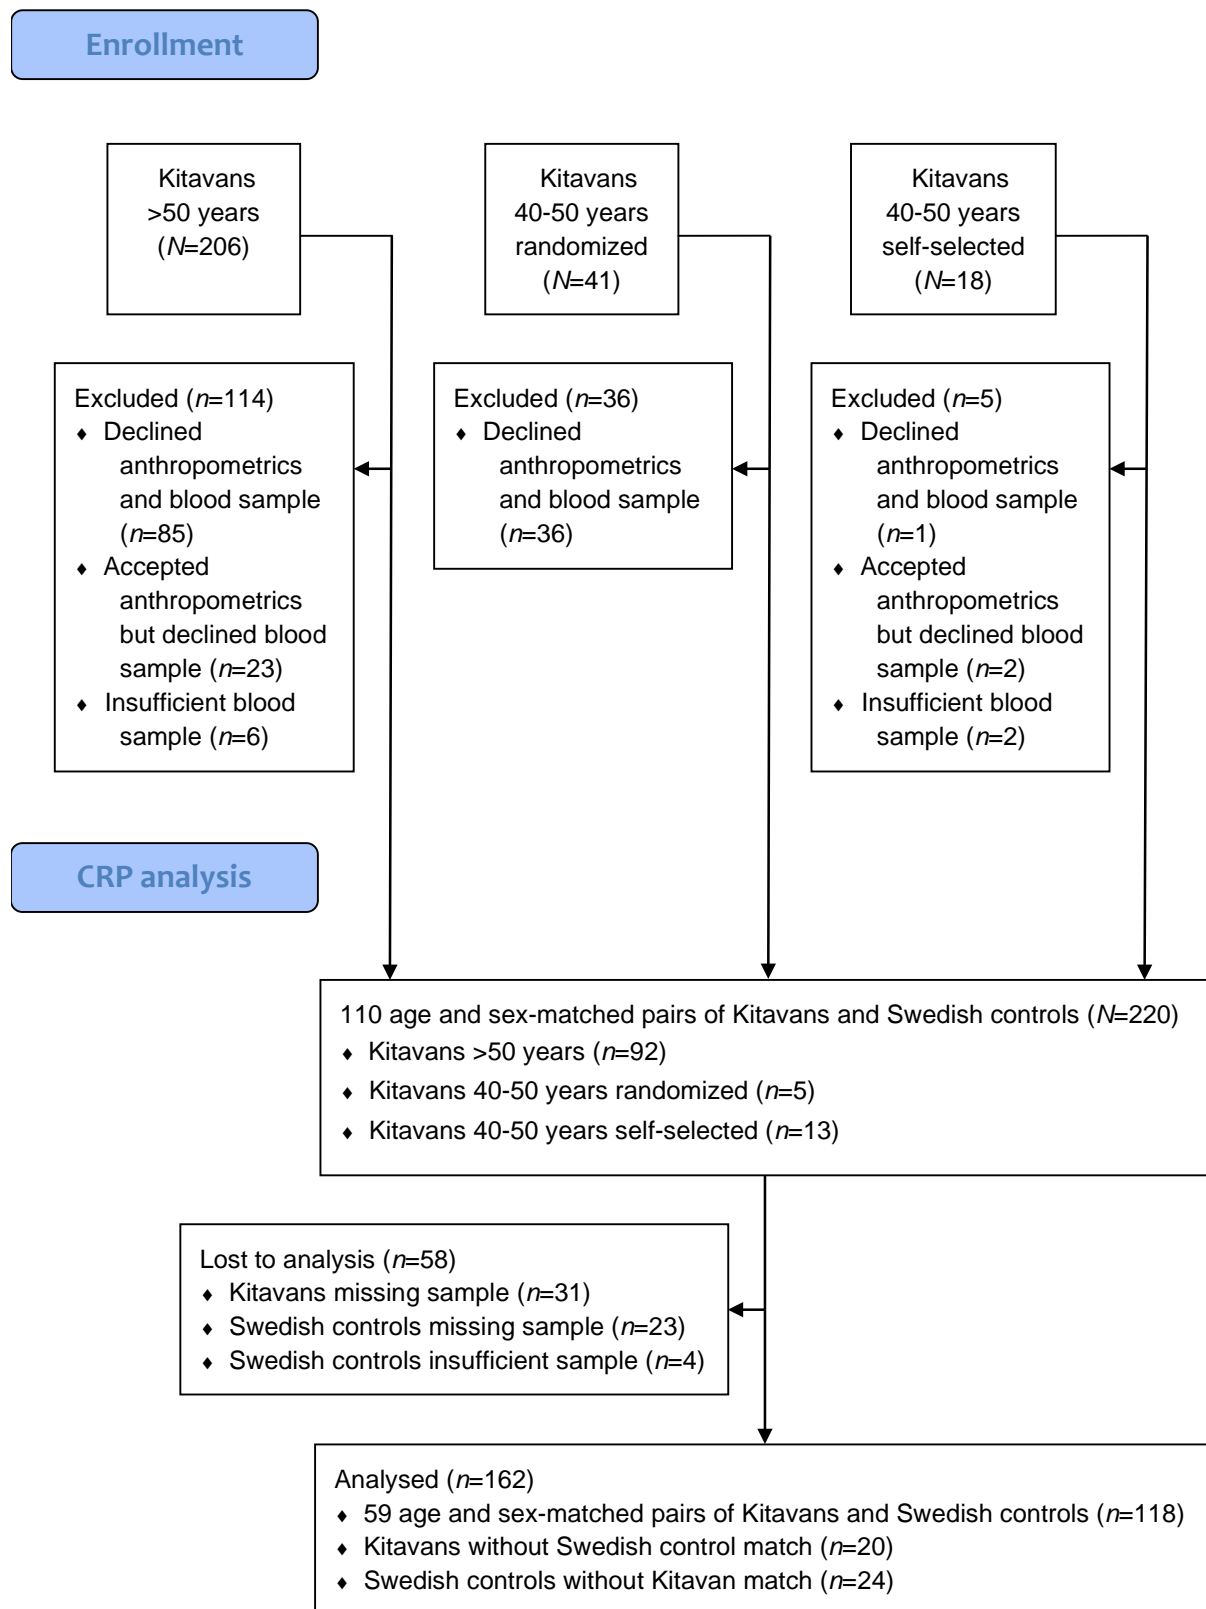

**Table S1***Clinical Characteristics of Included and Excluded Kitavans with Anthropometrics*

| Variable                                                               | Included            | Excluded            |
|------------------------------------------------------------------------|---------------------|---------------------|
| Male / female, <i>n</i> (%) <sup>*</sup>                               | 78 (71%) / 32 (29%) | 16 (48%) / 17 (52%) |
| Smoker / non-smoker, <i>n</i> (%)                                      | 79 (76%) / 25 (24%) | 25 (89%) / 3 (11%)  |
| Age, years <i>M</i> ( <i>SD</i> )                                      | 60 (11)             | 58 (10)             |
| Weight, kg <i>M</i> ( <i>SD</i> ) <sup>*</sup>                         | 48 (8)              | 43 (8)              |
| Height, cm <i>M</i> ( <i>SD</i> ) <sup>*</sup>                         | 158 (7)             | 154 (7)             |
| Body mass index, kg/m <sup>2</sup> <i>M</i> ( <i>SD</i> ) <sup>*</sup> | 19 (2)              | 18 (2)              |
| Waist circumference, cm <i>M</i> ( <i>SD</i> ) <sup>*</sup>            | 73 (5)              | 69 (6)              |
| Hip circumference, cm <i>M</i> ( <i>SD</i> ) <sup>*</sup>              | 79 (5)              | 76 (6)              |
| Waist-hip ratio <i>M</i> ( <i>SD</i> )                                 | 0.9 (0.0)           | 0.9 (0.1)           |
| Triceps skinfold, mm <i>M</i> ( <i>SD</i> )                            | 7.6 (2.8)           | 8.4 (3.4)           |
| Systolic blood pressure, mm Hg <i>M</i> ( <i>SD</i> ) <sup>*</sup>     | 118 (18)            | 124 (15)            |
| Diastolic blood pressure, mm Hg <i>M</i> ( <i>SD</i> )                 | 70 (7)              | 72 (7)              |

*Note.* <sup>\*</sup> *p* < .05.

**Table S2***Clinical Characteristics of Included not Self-selected and Self-selected Kitavans*

| Variable                                                                 | Not self-selected   | Self-selected      |
|--------------------------------------------------------------------------|---------------------|--------------------|
| Male / female, <i>n</i> (%)                                              | 67 (69%) / 30 (31%) | 11 (85%) / 2 (15%) |
| Smoker / non-smoker, <i>n</i> (%)                                        | 72 (78%) / 20 (22%) | 7 (58%) / 5 (42%)  |
| Age, years <i>M</i> ( <i>SD</i> ) *                                      | 62 (9)              | 44 (3)             |
| Weight, kg <i>M</i> ( <i>SD</i> )*                                       | 47 (7)              | 52 (7)             |
| Height, cm <i>M</i> ( <i>SD</i> )                                        | 158 (7)             | 158 (4)            |
| Body mass index, kg/m <sup>2</sup> <i>M</i> ( <i>SD</i> ) *              | 19 (2)              | 21 (2)             |
| Waist circumference, cm <i>M</i> ( <i>SD</i> )                           | 72 (5)              | 74 (5)             |
| Hip circumference, cm <i>M</i> ( <i>SD</i> )                             | 79 (5)              | 79 (4)             |
| Waist-hip ratio <i>M</i> ( <i>SD</i> )                                   | 0.9 (0.0)           | 0.9 (0.1)          |
| Triceps skinfold, mm <i>M</i> ( <i>SD</i> )                              | 7.6 (2.8)           | 7.3 (3.4)          |
| Systolic blood pressure, mm Hg <i>M</i> ( <i>SD</i> )                    | 118 (18)            | 118 (13)           |
| Diastolic blood pressure, mm Hg <i>M</i> ( <i>SD</i> )                   | 71 (72)             | 71 (8)             |
| Fasting blood glucose, mmol/L <i>M</i> ( <i>SD</i> )                     | 3.9 (0.7)           | 3.6 (0.5)          |
| Fasting serum insulin, IU/mL <i>M</i> ( <i>SD</i> )                      | 3.8 (3.1)           | 8.8 (9.9)          |
| Total cholesterol, mmol/L <i>M</i> ( <i>SD</i> )                         | 5.1 (1.2)           | 4.9 (1.1)          |
| LDL, mmol/L <i>M</i> ( <i>SD</i> )                                       | 3.5 (1.1)           | 3.3 (1.0)          |
| HDL, mmol/L <i>M</i> ( <i>SD</i> )                                       | 1.1 (0.3)           | 1.1 (0.2)          |
| Triglyceride, mmol/L <i>M</i> ( <i>SD</i> )                              | 1.2 (0.4)           | 1.2 (0.6)          |
| Non-HDL cholesterol, mmol/L <i>M</i> ( <i>SD</i> )                       | 4.0 (1.1)           | 3.8 (1.1)          |
| Total cholesterol-HDL ratio, mol/mol <i>M</i> ( <i>SD</i> ) <sup>a</sup> | 5.0 (1.4)           | 4.7 (1.3)          |
| LDL-HDL ratio, mol/mol <i>M</i> ( <i>SD</i> ) <sup>a</sup>               | 3.4 (1.2)           | 3.1 (1.2)          |
| Triglyceride-HDL ratio, mol/mol <i>M</i> ( <i>SD</i> ) <sup>a</sup>      | 1.2 (0.6)           | 1.2 (0.7)          |
| Leptin, ng/mL <i>Mdn</i> (range)*                                        | 1.9 (0.7 - 25)      | 1.4 (0.8 - 8.8)    |
| C-reactive protein, mg/L <i>Mdn</i> (range)                              | 0.47 (0.14 - 48)    | 0.46 (0.14 - 6.9)  |

*Note.* LDL = low-density lipoprotein cholesterol. HDL = high-density lipoprotein cholesterol.

<sup>a</sup> Values in mmol/L for ratios. \*  $p < .05$ .

**Table S3**

*Clinical Characteristics of Kitavans and Swedish Controls with Samples Analyzed for C-reactive Protein and Samples Lost to Analysis*

| Variable                                                                 | Kitavans                 |                          | Swedish controls         |                          |
|--------------------------------------------------------------------------|--------------------------|--------------------------|--------------------------|--------------------------|
|                                                                          | Samples analysed for CRP | Samples lost to analysis | Samples analysed for CRP | Samples lost to analysis |
| Male / female, <i>n</i> (%) <sup>*</sup>                                 | 61 (77%) / 18 (23%)      | 17 (55%) / 14 (45%)      | 58 (70%) / 25 (30%)      | 20 (74%) / 7 (26%)       |
| Smoker / non-smoker, <i>n</i> (%) <sup>*</sup>                           | 52 (69%) / 23 (31%)      | 27 (93%) / 2 (7%)        | 20 (24%) / 63 (76%)      | 7 (26%) / 20 (74%)       |
| Diabetic / non-diabetic, <i>n</i> (%)                                    | 0 (0%) / 79 (100%)       | 0 (0%) / 79 (100%)       | 10 (12%) / 73 (88%)      | 2 (7%) / 25 (93%)        |
| Hypertensive / non-hypertensive, <i>n</i> (%)                            | 0 (0%) / 79 (100%)       | 0 (0%) / 79 (100%)       | 11 (13%) / 72 (87%)      | 4 (15%) / 23 (85%)       |
| Age, years <i>M</i> ( <i>SD</i> ) <sup>*</sup>                           | 58 (11)                  | 64 (8)                   | 60 (10)                  | 59 (12)                  |
| Weight, kg <i>M</i> ( <i>SD</i> )                                        | 48 (8)                   | 46 (6)                   | 77 (13)                  | 80 (13)                  |
| Height, cm <i>M</i> ( <i>SD</i> )                                        | 159 (7)                  | 156 (6)                  | 173 (9)                  | 174 (8)                  |
| Body mass index, kg/m <sup>2</sup> <i>M</i> ( <i>SD</i> )                | 19 (2)                   | 19 (2)                   | 26 (4)                   | 26 (4)                   |
| Waist circumference, cm <i>M</i> ( <i>SD</i> )                           | 73 (5)                   | 73 (4)                   | 89 (12)                  | 92 (11)                  |
| Hip circumference, cm <i>M</i> ( <i>SD</i> )                             | 78 (5)                   | 79 (5)                   | 101 (8)                  | 102 (9)                  |
| Waist-hip ratio <i>M</i> ( <i>SD</i> )                                   | 0.9 (0.0)                | 0.9 (0.0)                | 0.9 (0.1)                | 0.9 (0.1)                |
| Triceps skinfold, mm <i>M</i> ( <i>SD</i> ) <sup>*</sup>                 | 7.3 (2.6)                | 8.6 (3.3)                | No data                  | No data                  |
| Systolic blood pressure, mm Hg <i>M</i> ( <i>SD</i> )                    | 117 (17)                 | 122 (20)                 | 136 (19)                 | 132 (13)                 |
| Diastolic blood pressure, mm Hg <i>M</i> ( <i>SD</i> )                   | 70 (7)                   | 71 (6)                   | 77 (9)                   | 77 (11)                  |
| Fasting blood glucose, mmol/L <i>M</i> ( <i>SD</i> )                     | 3.8 (0.7)                | 4.0 (0.5)                | 5.1 (1.4)                | 4.8 (0.8)                |
| Fasting serum insulin, IU/mL <i>M</i> ( <i>SD</i> )                      | 4.7 (5.2)                | 3.6 (2.8)                | 6.2 (6.1)                | 5.6 (4.2)                |
| Total cholesterol, mmol/L <i>M</i> ( <i>SD</i> )                         | 5.0 (1.2)                | 5.1 (1.1)                | 5.7 (1.0)                | 6.0 (0.8)                |
| LDL, mmol/L <i>M</i> ( <i>SD</i> )                                       | 3.4 (1.1)                | 3.5 (1.0)                | 4.0 (0.9)                | 4.2 (0.7)                |
| HDL, mmol/L <i>M</i> ( <i>SD</i> )                                       | 1.0 (0.3)                | 1.1 (0.2)                | 1.2 (0.3)                | 1.1 (0.2)                |
| Triglyceride, mmol/L <i>M</i> ( <i>SD</i> ) <sup>**</sup>                | 1.2 (0.5)                | 1.1 (0.4)                | 1.3 (0.8)                | 1.5 (0.6)                |
| Non-HDL cholesterol, mmol/L <i>M</i> ( <i>SD</i> )                       | 4.0 (1.1)                | 4.0 (1.1)                | 4.6 (0.9)                | 4.9 (0.8)                |
| Total cholesterol-HDL ratio, mol/mol <i>M</i> ( <i>SD</i> ) <sup>a</sup> | 5.0 (1.4)                | 4.8 (1.4)                | 5.2 (1.4)                | 5.7 (1.2)                |
| LDL-HDL ratio, mol/mol <i>M</i> ( <i>SD</i> ) <sup>a</sup>               | 3.4 (1.3)                | 3.3 (1.2)                | 3.6 (1.1)                | 4.0 (1.0)                |
| Triglyceride-HDL ratio, mol/mol <i>M</i> ( <i>SD</i> ) <sup>a***</sup>   | 1.3 (0.7)                | 1.1 (0.6)                | 1.3 (1.1)                | 1.4 (0.7)                |
| Leptin, ng/mL <i>Mdn</i> (range) <sup>*</sup>                            | 1.7 (0.7 - 25)           | 2.2 (0.9 - 8.7)          | No data                  | No data                  |

*Note.* LDL = low-density lipoprotein cholesterol. HDL = high-density lipoprotein cholesterol. <sup>a</sup> Values in mmol/L for ratios. \* and \*\*  $p < .05$  for group comparison among Kitavans and Swedish controls, respectively.

**Table S4**

*Clinical Characteristics of Swedish Controls with Samples Analyzed for C-reactive Protein Without or With a Diagnose of Type 2 Diabetes or Hypertension*

| Variable                                                                  | Without diagnose    | With diagnose      |
|---------------------------------------------------------------------------|---------------------|--------------------|
| Male / female, <i>n</i> (%)                                               | 44 (69%) / 20 (31%) | 14 (74%) / 5 (26%) |
| Smoker / non-smoker, <i>n</i> (%)                                         | 17 (27%) / 47 (73%) | 3 (16%) / 16 (84%) |
| Age, years <i>M</i> ( <i>SD</i> ) *                                       | 58 (10)             | 66 (10)            |
| Weight, kg <i>M</i> ( <i>SD</i> )                                         | 76 (13)             | 78 (15)            |
| Height, cm <i>M</i> ( <i>SD</i> ) *                                       | 174 (9)             | 169 (8)            |
| Body mass index, kg/m <sup>2</sup> <i>M</i> ( <i>SD</i> )                 | 25 (3)              | 27 (6)             |
| Waist circumference, cm <i>M</i> ( <i>SD</i> )                            | 88 (11)             | 94 (14)            |
| Hip circumference, cm <i>M</i> ( <i>SD</i> )                              | 101 (7)             | 103 (12)           |
| Waist-hip ratio <i>M</i> ( <i>SD</i> )                                    | 0.9 (0.1)           | 0.9 (0.1)          |
| Systolic blood pressure, mm Hg <i>M</i> ( <i>SD</i> ) *                   | 134 (20)            | 145 (15)           |
| Diastolic blood pressure, mm Hg <i>M</i> ( <i>SD</i> )                    | 77 (9)              | 79 (9)             |
| Fasting blood glucose, mmol/L <i>M</i> ( <i>SD</i> ) *                    | 4.8 (0.6)           | 6.1 (2.6)          |
| Fasting serum insulin, IU/mL <i>M</i> ( <i>SD</i> )                       | 5.6 (5.4)           | 8.1 (7.9)          |
| Total cholesterol, mmol/L <i>M</i> ( <i>SD</i> )                          | 5.7 (1.0)           | 5.8 (0.8)          |
| LDL, mmol/L <i>M</i> ( <i>SD</i> )                                        | 4.0 (1.0)           | 4.1 (0.8)          |
| HDL, mmol/L <i>M</i> ( <i>SD</i> )                                        | 1.2 (0.3)           | 1.1 (0.3)          |
| Triglyceride, mmol/L <i>M</i> ( <i>SD</i> ) *                             | 1.2 (0.7)           | 1.6 (0.9)          |
| Non-HDL cholesterol, mmol/L <i>M</i> ( <i>SD</i> )                        | 4.5 (1.0)           | 4.8 (0.8)          |
| Total cholesterol-HDL ratio, mol/mol <i>M</i> ( <i>SD</i> ) <sup>a*</sup> | 5.0 (1.3)           | 5.8 (1.5)          |
| LDL-HDL ratio, mol/mol <i>M</i> ( <i>SD</i> ) <sup>a</sup>                | 3.5 (1.1)           | 4.0 (1.2)          |
| Triglyceride-HDL ratio, mol/mol <i>M</i> ( <i>SD</i> ) <sup>a*</sup>      | 1.1 (0.9)           | 1.7 (1.4)          |
| C-reactive protein, mg/L <i>Mdn</i> (range)                               | 1.05 (0.14 - 33)    | 1.10 (0.14 - 16)   |
| C-reactive protein < 10, mg/L <i>Mdn</i> (range)                          | 0.93 (0.14 - 7.2)   | 1.00 (0.14 - 6.8)  |

*Note.* LDL = low-density lipoprotein cholesterol. HDL = high-density lipoprotein cholesterol.

<sup>a</sup> Values in mmol/L for ratios. \* *p* < .05.
